# Supplementary material
Source: HighWire-hosted journal article supplement (https://www.jneurosci.org/highwire/filestream/599115/field_highwire_adjunct_files/3/Supplemental_Legend.pdf)
Supplement: Supplemental_Legend.pdf [file Supplemental_Legend.pdf]

**Supplementary Figure 1. Differences in GABA tonic currents in D1+ and D2+ MSNs are not the result of differences in GABA uptake.** Representative traces from (A) aD1+ and (B) aD2+ MSN demonstrate the inward current induced by blocking the neuronal GABA transporter GAT-1 with NO711 (5  $\mu$ M) followed by application of BIC. (C), Summary of tonic current induced by NO711 (5  $\mu$ M) in D1+ MSNs (*white bar, n=7*) and in D2+ (*black bar, n=6*) as well as the total BIC-sensitive tonic current in D1+ MSNs (*white bar, n=5*) and D2+ MSNs (*black bar, n=5*).

**Supplementary Figure 2. (A)** Example of immunostaining with  $\alpha$ 5 subunit selective antibodies of MSNs in a striatal slice from a P18 BAC-D2-EGFP mouse. Image showing overlapping EGFP expression and DIC photomicrographs (*left*), Cy3 labeling of the  $\alpha$ 5 subunit puncta (*middle*) and overlapping EGFP, DIC and Cy3 (*right*). **(B)** Example of immunostaining with  $\alpha$ 2 subunit selective antibodies of MSNs in a striatal slice from a P18 BAC-D2-EGFP mouse. Image showing overlapping EGFP expression and DIC photomicrographs (*left*) Cy3 labeling of the  $\alpha$ 2 subunit puncta (*middle*) and overlapping EGFP, DIC and Cy3 (*right*). In both **(A & B)**, D1+ MSNs are identified with cyan arrows and D2+ MSNs are identified with yellow arrows. Scale bars 10  $\mu$ m.

**Supplementary Figure 3. (A)** Examples of cell-attached patch recording in D1+ and D2+ MSNs recorded with KCl internal solution in response to voltage ramps as indicated below. Traces are vertically distributed for illustration purpose. Dashed vertical lines indicated the  $E_K$  in control condition, in the presence of 5  $\mu$ M GABA and during wash out. **(B)** Summary of the changes elicited by 5  $\mu$ M GABA (12 D1+ and 19 D2+ MSNs), 50 nM L655,708 (3 D1+ and 5 D2+ MSNs) and 10  $\mu$ M Gabazine (3 D1+ and 5 D2+ MSNs). \* significantly different from 0.
